# Supplementary material for: A view on recent ice-nucleating particle intercomparison studies: Why the uncertainty of the activation conditions matters
Source: Copernicus journal article supplement (doi:10.5194/egusphere-2024-3778), 2025-01-13
Supplement: Supplementary file 1 [file egusphere-2024-3778-supplement.pdf]

## Supplementary Material

**Table S1: Reported temperature uncertainty of instruments participating in the identified intercomparison studies. We refer to the listed studies for full instrument and institute names.**

| Study                     | Instrument    | $\Delta T$ [ $^{\circ}\text{C}$ ] | Uncertainty reported in |
|---------------------------|---------------|-----------------------------------|-------------------------|
| Hiranuma et al., 2015     | AIDA          | $\pm 0.3$                         | Original Study          |
| Hiranuma et al., 2015     | BINARY        | $\pm 0.3$                         | Original Study          |
| Hiranuma et al., 2015     | CSU-CFDC      | $\pm 0.5$                         | Original Study          |
| Hiranuma et al., 2015     | CSU-IS        | $\pm 0.2$                         | Original Study          |
| Hiranuma et al., 2015     | CU-RMCS       | $\pm 0.5$                         | Original Study          |
| Hiranuma et al., 2015     | EDB           | $\pm 0.2$                         | Original Study          |
| Hiranuma et al., 2015     | FINCH         | $\pm 1.5$                         | Original Study          |
| Hiranuma et al., 2015     | FRIDGE-CS     | $\pm 0.2$                         | Original Study          |
| Hiranuma et al., 2015     | FRIDGE-DC     | $\pm 0.2$                         | Original Study          |
| Hiranuma et al., 2015     | IMCA-ZINC     | $\pm 0.4$                         | Original Study          |
| Hiranuma et al., 2015     | LACIS         | $\pm 0.3$                         | Original Study          |
| Hiranuma et al., 2015     | M-AL          | $\pm 0.7$                         | Original Study          |
| Hiranuma et al., 2015     | MRI-DCECC     | $\pm 1$                           | Original Study          |
| Hiranuma et al., 2015     | M-WT          | $\pm 1$                           | Original Study          |
| Hiranuma et al., 2015     | NC State-CS   | $\pm 1^{\text{a}}$                | Original Study          |
| Hiranuma et al., 2015     | NIPI          | $\pm 0.4$                         | Original Study          |
| Hiranuma et al., 2015     | PINC          | $\pm 0.5^{\text{b}}$              | Original Study          |
| Hiranuma et al., 2015     | PNNL-CIC      | $\pm 0.3$                         | Original Study          |
| Wex et al., 2015          | AIDA          | $\pm 0.3$                         | Original Study          |
| Wex et al., 2015          | BINARY        | $\pm 0.3^{\text{c}}$              | Budke and Koop, 2015    |
| Wex et al., 2015          | FINCH         | $\pm 1.5^{\text{d}}$              | Hiranuma et al., 2015   |
| Wex et al., 2015          | LACIS         | $\pm 0.3$                         | Hartmann et al., 2011   |
| Wex et al., 2015          | M-AL          | $\pm 0.7$                         | Original Study          |
| Wex et al., 2015          | M-WT          | $\pm 0.75$                        | Original Study          |
| Wex et al., 2015          | PINC          | $\pm 0.5^{\text{b}}$              | Original Study          |
| Burkert-Kohn et al., 2017 | LACIS         | $\pm 0.3$                         | Original Study          |
| Burkert-Kohn et al., 2017 | PIMCA-PINC    | $\pm 0.5^{\text{b}}$              | Original Study          |
| Burkert-Kohn et al., 2017 | PINC          | $\pm 0.5^{\text{b}}$              | Original Study          |
| Burkert-Kohn et al., 2017 | TROPOS-SPIN   | $\pm 1^{\text{f}}$                | Original Study          |
| DeMott et al., 2017       | CSU-CFDC      | $\pm 0.5$                         | Original Study          |
| DeMott et al., 2017       | CSU-IS        | $\pm 0.4$                         | Original Study          |
| DeMott et al., 2017       | NC State-CS   | $\pm 1$                           | Original Study          |
| DeMott et al., 2017       | NIPR-CRAFT    | $\pm 0.2$                         | Original Study          |
| DeMott et al., 2017       | UBC-MOUDI-DFT | $\pm 0.3^{\text{c}}$              | Mason et al., 2015      |

**Table S1: Continued.**

| Study                 | Instrument      | $\Delta T$ [°C]    | Uncertainty reported in |
|-----------------------|-----------------|--------------------|-------------------------|
| DeMott et al., 2018   | AIDA            | $\pm 0.3$          | Original Study          |
| DeMott et al., 2018   | BINARY          | $\pm 0.3$          | Original Study          |
| DeMott et al., 2018   | CIC-PNNL        | $\pm 1$            | Original Study          |
| DeMott et al., 2018   | CMU-CS          | $\pm 0.5^c$        | Polen et al., 2016      |
| DeMott et al., 2018   | CSU-CFDC        | $\pm 0.5$          | Original Study          |
| DeMott et al., 2018   | CSU-IS          | $\pm 0.5^e$        | Lacher et al., 2024     |
| DeMott et al., 2018   | DFPC-ISAC       | $\pm 0.1^d$        | Hiranuma et al., 2019   |
| DeMott et al., 2018   | FRIDGE-CS       | $\pm 0.2$          | Original Study          |
| DeMott et al., 2018   | FRIDGE-DC       | $\pm 0.2$          | Original Study          |
| DeMott et al., 2018   | INKA            | $\pm 1$            | Original Study          |
| DeMott et al., 2018   | KIT-CS (INSEKT) | $\pm 0.1$          | Original Study          |
| DeMott et al., 2018   | M-AL            | $\pm 0.5$          | Original Study          |
| DeMott et al., 2018   | MIT-SPIN        | $\pm 0.5^{d,f}$    | DeMott et al., 2024     |
| DeMott et al., 2018   | NC State-CS     | $\pm 1^d$          | Hiranuma et al., 2015   |
| DeMott et al., 2018   | NIPI            | $\pm 0.4$          | Original Study          |
| DeMott et al., 2018   | PIMCA-PINC      | $\pm 0.5^b$        | Original Study          |
| DeMott et al., 2018   | PINC            | $\pm 0.5^b$        | Original Study          |
| DeMott et al., 2018   | TAMU-CFDC       | $\pm 1.5^{c,g}$    | Zenker et al., 2017     |
| DeMott et al., 2018   | TROPOS-SPIN     | $\pm 1^f$          | Original Study          |
| DeMott et al., 2018   | VODCA           | $\pm 0.5^h$        | Original Study          |
| DeMott et al., 2018   | WISDOM          | $\pm 0.3$          | Original Study          |
| Hiranuma et al., 2019 | AIDA            | $\pm 0.3$          | Original Study          |
| Hiranuma et al., 2019 | BINARY          | $\pm 0.3$          | Original Study          |
| Hiranuma et al., 2019 | CMU-CS          | $\pm 0.5$          | Original Study          |
| Hiranuma et al., 2019 | CSU-CFDC        | $\pm 0.5$          | Original Study          |
| Hiranuma et al., 2019 | DFPC-ISAC       | $\pm 0.1$          | Original Study          |
| Hiranuma et al., 2019 | EDB             | $\pm 0.2$          | Original Study          |
| Hiranuma et al., 2019 | FRIDGE-CS       | $\pm 0.2$          | Original Study          |
| Hiranuma et al., 2019 | FRIDGE-DC       | $\pm 0.2$          | Original Study          |
| Hiranuma et al., 2019 | INKA            | $\pm 1$            | Original Study          |
| Hiranuma et al., 2019 | LACIS           | $\pm 0.3$          | Original Study          |
| Hiranuma et al., 2019 | LINDA           | $\pm 0.2$          | Original Study          |
| Hiranuma et al., 2019 | M-AL            | $\pm 0.7$          | Original Study          |
| Hiranuma et al., 2019 | MRI-DCECC       | $\pm 1$            | Original Study          |
| Hiranuma et al., 2019 | M-WT            | $\pm 0.5$          | Original Study          |
| Hiranuma et al., 2019 | NC State-CS     | $\pm 0.2; \pm 1^i$ | Original Study          |
| Hiranuma et al., 2019 | NIPI            | $\pm 0.4$          | Original Study          |
| Hiranuma et al., 2019 | NIPR-CRAFT      | $\pm 0.2$          | Original Study          |

**Table S1: Continued.**

| Study                 | Instrument     | $\Delta T$ [ $^{\circ}\text{C}$ ] | Uncertainty reported in             |
|-----------------------|----------------|-----------------------------------|-------------------------------------|
| Hiranuma et al., 2019 | PNNL-CIC       | $\pm 1$                           | Original Study                      |
| Hiranuma et al., 2019 | WISDOM         | $\pm 0.3$                         | Original Study                      |
| Hiranuma et al., 2019 | WT-CRAFT       | $\pm 0.5$                         | Original Study                      |
| Knopf et al., 2021    | CSU-CFDC       | $\pm 0.5$                         | Original Study                      |
| Knopf et al., 2021    | CSU-IS         | $\pm 0.5^{\text{e}}$              | Lacher et al., 2024                 |
| Knopf et al., 2021    | DRUM-CP        | $\pm 1.25^{\text{c,j}}$           | Creamean et al., 2019               |
| Knopf et al., 2021    | MINT (CMU-CS)  | $\pm 0.5^{\text{c}}$              | Polen et al., 2018                  |
| Knopf et al., 2021    | MOUDI-DFT      | $\pm 0.3$                         | Original Study                      |
| Knopf et al., 2021    | PINE-c         | $\pm 1$                           | Original Study                      |
| Brasseur et al., 2022 | INSEKT         | $\pm 0.3^{\text{c}}$              | Schiebel, 2017                      |
| Brasseur et al., 2022 | NIPI           | $\pm 0.4^{\text{d}}$              | Hiranuma et al., 2019               |
| Brasseur et al., 2022 | PINC           | $\pm 0.5^{\text{b,d}}$            | DeMott et al. 2018                  |
| Brasseur et al., 2022 | PINCii         | $\pm 0.35^{\text{c,k}}$           | Casterede and Brasseur et al., 2023 |
| Brasseur et al., 2022 | PINE           | $\pm 1^{\text{c}}$                | Möhler et al. 2021                  |
| Brasseur et al., 2022 | UEF-SPIN       | $\pm 1^{\text{d,f}}$              | Burkert-Kohn et al., 2017           |
| Lacher et al., 2024   | CSU-CFDC       | $\pm 0.5$                         | Original Study                      |
| Lacher et al., 2024   | CSU-IS         | $\pm 0.5$                         | Original Study                      |
| Lacher et al., 2024   | FRIDGE-CS      | $\pm 0.2$                         | Original Study                      |
| Lacher et al., 2024   | INDA           | $\pm 0.5^{\text{c}}$              | Chen et al. 2018                    |
| Lacher et al., 2024   | INSEKT         | $\pm 0.2$                         | Original Study                      |
| Lacher et al., 2024   | LINA           | $\pm 0.5^{\text{c}}$              | Chen et al. 2018                    |
| Lacher et al., 2024   | LINDA          | $\pm 0.2^{\text{d}}$              | Hiranuma et al., 2019               |
| Lacher et al., 2024   | MIT-SPIN       | $\pm 0.5^{\text{f}}$              | Original Study                      |
| Lacher et al., 2024   | PINE-1A        | $\pm 1$                           | Original Study                      |
| Lacher et al., 2024   | UNAM-MOUDI-DFT | $\pm 0.1$                         | Original Study                      |
| DeMott et al., 2024   | CSU-CFDC       | $\pm 0.5$                         | Original Study                      |
| DeMott et al., 2024   | CSU-IS         | $\pm 0.2$                         | Original Study                      |
| DeMott et al., 2024   | FRIDGE-CS      | $\pm 0.5$                         | Original Study                      |
| DeMott et al., 2024   | FRIDGE-DC      | $\pm 0.5$                         | Original Study                      |
| DeMott et al., 2024   | MIT-SPIN       | $\pm 0.5^{\text{f}}$              | Original Study                      |
| DeMott et al., 2024   | NC State-CS    | $\pm 1^{\text{l}}$                | Original Study                      |

a: The stated tolerance of  $\pm 1$   $^{\circ}\text{C}$  of the thermistor is used as uncertainty here, while repeatability tests showed a precision of  $\pm 0.1^{\circ}\text{C}$ .

b: The uncertainty listed here is the sum of the sensor accuracy stated as  $\pm 0.1$   $^{\circ}\text{C}$  and temperature variation across the sample laminar of  $\pm 0.4$   $^{\circ}\text{C}$ .

c: The temperature uncertainty was not indicated in the original study, therefore a referenced instrument paper was scanned for this information.

d: The temperature uncertainty was not indicated in the original study, therefore another here identified intercomparison study was scanned for this information.

e: The temperature uncertainty was not indicated in the original study and there were multiple deviating assessments in different studies. Therefore, the highest uncertainty given in the most recent publication was selected.

f: MIT-SPIN uncertainties are reported as  $\pm 0.5^\circ\text{C}$ , while TROPOS-SPIN states an uncertainty of  $\pm 1^\circ\text{C}$  in Burkert-Kohn et al. (2017), although both assessments are likely based on the same results presented in Garimella et al. (2016). Further, UEF-SPIN temperature uncertainty is not indicated, we select to list the conservative uncertainty of  $\pm 1^\circ\text{C}$  in this case of deviating assessments.

g: In Zenker et al. (2017) an exemplary measurement from FIN-02 (i.e. DeMott et al., 2018) of Snomax is discussed. Therein, it is stated that the CFDC was operated at  $-15^\circ\text{C} \pm 1.5^\circ\text{C}$ . From the text it is not clear if this is indicative of the temperature uncertainty, which we assume, or the temperature variation during an individual experiment.

h: Earlier studies of Pummer et al. (2012) and Zolles et al. (2015) report the temperature uncertainty as  $\pm 1^\circ\text{C}$ . A later study of Häusler et al. (2018) states the temperature accuracy as  $\pm 0.5^\circ\text{C}$  though. In the original study  $0.5^\circ\text{C}$  is indicated as the standard deviation of the temperature measurement, therefore we list  $\pm 0.5^\circ\text{C}$  as uncertainty here.

i: For parts of the measurements a temperature uncertainty of  $\pm 1^\circ\text{C}$  is indicated (Cellulose MCC and FC), for other parts  $\pm 0.2^\circ\text{C}$  is stated (Cellulose NCC).

j: Creamean et al. (2019) report a sensor accuracy of  $\pm(0.4\% + 1)^\circ\text{C}$  in addition to a  $\pm 0.15^\circ\text{C}$  accuracy uncertainty due to a correction factor. At an exemplary temperature of  $-25^\circ\text{C}$  this adds up to  $\pm 1.25^\circ\text{C}$ .

k: Castarède and Brasseur et al. (2023) report that the standard error in the laminar temperature can exceed  $\pm 0.35^\circ\text{C}$ . Further, they state that this error only encapsulates the spatial temperature variability in the chamber and does not account other measurement uncertainties. Therefore, they note that the actual measurement uncertainty is higher, but since the authors do not give any other estimate we use  $\pm 0.35^\circ\text{C}$  as temperature uncertainty.

l: The typical mean temperature uncertainty of measurements is reported as  $\pm 0.5^\circ\text{C}$  to  $\pm 1^\circ\text{C}$ . In this study we used the conservative assessment of  $\pm 1^\circ\text{C}$ . Furthermore, temperature measurement precision is stated as  $\pm 0.1^\circ\text{C}$ .

## References

Brasseur, Z., Castarède, D., Thomson, E. S., Adams, M. P., Drossaert van Dusseldorp, S., Heikkilä, P., Korhonen, K., Lampilahti, J., Paramonov, M., Schneider, J., Vogel, F., Wu, Y., Abbatt, J. P. D., Atanasova, N. S., Bamford, D. H., Bertozzi, B., Boyer, M., Brus, D., Daily, M. I., Fösig, R., Gute, E., Harrison, A. D., Hietala, P., Höhler, K., Kanji, Z. A., Keskinen, J., Lacher, L., Lampimäki, M., Levula, J., Manninen, A., Nadolny, J., Peltola, M., Porter, G. C. E., Poutanen, P., Proske, U., Schorr, T., Silas Umo, N., Stenszky, J., Virtanen, A., Moisseev, D., Kulmala, M., Murray, B. J., Petäjä, T., Möhler, O., and Duplissy, J.: Measurement report: Introduction to the HyICE-2018 campaign for measurements of ice-nucleating particles and instrument inter-comparison in the Hyytiälä boreal forest, *Atmos. Chem. Phys.*, 22, 5117–5145, <https://doi.org/10.5194/acp-22-5117-2022>, 2022.

Burkert-Kohn, M., Wex, H., Welti, A., Hartmann, S., Grawe, S., Hellner, L., Herenz, P., Atkinson, J. D., Stratmann, F., and Kanji, Z. A.: Leipzig Ice Nucleation chamber Comparison (LINC): intercomparison of four online ice nucleation counters, *Atmos. Chem. Phys.*, 17, 11683–11705, <https://doi.org/10.5194/acp-17-11683-2017>, 2017.

Budke, C. and Koop, T.: BINARY: an optical freezing array for assessing temperature and time dependence of heterogeneous ice nucleation, *Atmos. Meas. Tech.*, 8, 689–703, <https://doi.org/10.5194/amt-8-689-2015>, 2015.

Castarède, D., Brasseur, Z., Wu, Y., Kanji, Z. A., Hartmann, M., Ahonen, L., Bilde, M., Kulmala, M., Petäjä, T., Pettersson, J. B. C., Sierau, B., Stetzer, O., Stratmann, F., Svenningsson, B., Swietlicki, E., Thu Nguyen, Q., Duplissy, J., and Thomson, E. S.: Development and characterization of the Portable Ice Nucleation Chamber 2 (PINCi), *Atmos. Meas. Tech.*, 16, 3881–3899, <https://doi.org/10.5194/amt-16-3881-2023>, 2023.

Chen, J., Wu, Z., Augustin-Bauditz, S., Grawe, S., Hartmann, M., Pei, X., Liu, Z., Ji, D., and Wex, H.: Ice-nucleating particle concentrations unaffected by urban air pollution in Beijing, China, *Atmos. Chem. Phys.*, 18, 3523–3539, <https://doi.org/10.5194/acp-18-3523-2018>, 2018.

Creamean, J. M., Mignani, C., Bukowiecki, N., and Conen, F.: Using freezing spectra characteristics to identify ice-nucleating particle populations during the winter in the Alps, *Atmos. Chem. Phys.*, **19**, 8123–8140, <https://doi.org/10.5194/acp-19-8123-2019>, 2019.

DeMott, P. J., Hill, T. C. J., Petters, M. D., Bertram, A. K., Tobo, Y., Mason, R. H., Suski, K. J., McCluskey, C. S., Levin, E. J. T., Schill, G. P., Boose, Y., Rauker, A. M., Miller, A. J., Zaragoza, J., Rocci, K., Rothfuss, N. E., Taylor, H. P., Hader, J. D., Chou, C., Huffman, J. A., Pöschl, U., Prenni, A. J., and Kreidenweis, S. M.: Comparative measurements of ambient atmospheric concentrations of ice nucleating particles using multiple immersion freezing methods and a continuous flow diffusion chamber, *Atmos. Chem. Phys.*, **17**, 11227–11245, <https://doi.org/10.5194/acp-17-11227-2017>, 2017.

DeMott, P. J., Möhler, O., Cziczo, D. J., Hiranuma, N., Petters, M. D., Petters, S. S., Belosi, F., Bingemer, H. G., Brooks, S. D., Budke, C., Burkert-Kohn, M., Collier, K. N., Danielczok, A., Eppers, O., Felgitsch, L., Garimella, S., Grothe, H., Herenz, P., Hill, T. C. J., Höhler, K., Kanji, Z. A., Kiselev, A., Koop, T., Kristensen, T. B., Krüger, K., Kulkarni, G., Levin, E. J. T., Murray, B. J., Nicosia, A., O'Sullivan, D., Peckhaus, A., Polen, M. J., Price, H. C., Reicher, N., Rothenberg, D. A., Rudich, Y., Santachiara, G., Schiebel, T., Schrod, J., Seifried, T. M., Stratmann, F., Sullivan, R. C., Suski, K. J., Szakáll, M., Taylor, H. P., Ullrich, R., Vergara-Temprado, J., Wagner, R., Whale, T. F., Weber, D., Welti, A., Wilson, T. W., Wolf, M. J., and Zenker, J.: The Fifth International Workshop on Ice Nucleation phase 2 (FIN-02): laboratory intercomparison of ice nucleation measurements, *Atmos. Meas. Tech.*, **11**, 6231–6257, <https://doi.org/10.5194/amt-11-6231-2018>, 2018.

DeMott, P., Mirrielees, J., Petters, S., Cziczo, D., Petters, M., Bingemer, H., Hill, T., Froyd, K., Garimella, S., Hallar, G., Levin, E., McCubbin, I., Perring, A., Rapp, C., Schiebel, T., Schrod, J., Suski, K., Weber, D., Wolf, M., Zawadowicz, M., Zenker, J., Möhler, O., and Brooks, S.: The Fifth International Workshop on Ice Nucleation Phase 3 (FIN-03): Field Intercomparison of Ice Nucleation Measurements, *EGUsphere* [preprint], <https://doi.org/10.5194/egusphere-2024-1744>, 2024.

Garimella, S., Kristensen, T. B., Ignatius, K., Welti, A., Voigtländer, J., Kulkarni, G. R., Sagan, F., Kok, G. L., Dorsey, J., Nichman, L., Rothenberg, D. A., Rösch, M., Kirchgäßner, A. C. R., Ladkin, R., Wex, H., Wilson, T. W., Ladino, L. A., Abbatt, J. P. D., Stetzer, O., Lohmann, U., Stratmann, F., and Cziczo, D. J.: The SPectrometer for Ice Nuclei (SPIN): an instrument to investigate ice nucleation, *Atmos. Meas. Tech.*, **9**, 2781–2795, <https://doi.org/10.5194/amt-9-2781-2016>, 2016.

Hartmann, S., Niedermeier, D., Voigtländer, J., Clauss, T., Shaw, R. A., Wex, H., Kiselev, A., and Stratmann, F.: Homogeneous and heterogeneous ice nucleation at LACIS: operating principle and theoretical studies, *Atmos. Chem. Phys.*, **11**, 1753–1767, <https://doi.org/10.5194/acp-11-1753-2011>, 2011.

Häusler, T., Gebhardt, P., Iglesias, D., Rameshan, C., Marchesan, S., Eder, D., and Grothe, H.: Ice Nucleation Activity of Graphene and Graphene Oxides, *J. Phys. Chem. C*, **122**, **15**, 8182–8190, <https://doi.org/10.1021/acs.jpcc.7b10675>, 2018.

Hiranuma, N., Augustin-Bauditz, S., Bingemer, H., Budke, C., Curtius, J., Danielczok, A., Diehl, K., Dreischmeier, K., Ebert, M., Frank, F., Hoffmann, N., Kandler, K., Kiselev, A., Koop, T., Leisner, T., Möhler, O., Nillius, B., Peckhaus, A., Rose, D., Weinbruch, S., Wex, H., Boose, Y., DeMott, P. J., Hader, J. D., Hill, T. C. J.,

Kanji, Z. A., Kulkarni, G., Levin, E. J. T., McCluskey, C. S., Murakami, M., Murray, B. J., Niedermeier, D., Petters, M. D., O'Sullivan, D., Saito, A., Schill, G. P., Tajiri, T., Tolbert, M. A., Welti, A., Whale, T. F., Wright, T. P., and Yamashita, K.: A comprehensive laboratory study on the immersion freezing behavior of illite NX particles: a comparison of 17 ice nucleation measurement techniques, *Atmos. Chem. Phys.*, 15, 2489–2518, <https://doi.org/10.5194/acp-15-2489-2015>, 2015.

Hiranuma, N., Adachi, K., Bell, D. M., Belosi, F., Beydoun, H., Bhaduri, B., Bingemer, H., Budke, C., Clemen, H.-C., Conen, F., Cory, K. M., Curtius, J., DeMott, P. J., Eppers, O., Grawe, S., Hartmann, S., Hoffmann, N., Höhler, K., Jantsch, E., Kiselev, A., Koop, T., Kulkarni, G., Mayer, A., Murakami, M., Murray, B. J., Nicosia, A., Petters, M. D., Piazza, M., Polen, M., Reicher, N., Rudich, Y., Saito, A., Santachiara, G., Schiebel, T., Schill, G. P., Schneider, J., Segev, L., Stopelli, E., Sullivan, R. C., Suski, K., Szakáll, M., Tajiri, T., Taylor, H., Tobo, Y., Ullrich, R., Weber, D., Wex, H., Whale, T. F., Whiteside, C. L., Yamashita, K., Zelenyuk, A., and Möhler, O.: A comprehensive characterization of ice nucleation by three different types of cellulose particles immersed in water, *Atmos. Chem. Phys.*, 19, 4823–4849, <https://doi.org/10.5194/acp-19-4823-2019>, 2019.

Knopf, D. A., Barry, K. R., Brubaker, T. A., Jahl, L. G., Jankowski, K. A., Li, J., Lu, Y., Monroe, L. W., Moore, K. A., Rivera-Adorno, F. A., Saucedo, K. A., Shi, Y., Tomlin, J. M., Vepuri, H. S. K., Wang, P., Lata, N. N., Levin, E. J. T., Creamean, J. M., Hill, T. C. J., China, S., Alpert, P. A., Moffet, R. C., Hiranuma, N., Sullivan, R. C., Fridlind, A. M., West, M., Riemer, N., Laskin, A., DeMott, P. J., and Liu, X.: Aerosol–Ice Formation Closure: A Southern Great Plains Field Campaign, *B. Am. Meteorol. Soc.*, 102, 10, E1952–E1971, <https://doi.org/10.1175/BAMS-D-20-0151.1>, 2021.

Lacher, L., Adams, M. P., Barry, K., Bertozzi, B., Bingemer, H., Boffo, C., Bras, Y., Büttner, N., Castarede, D., Cziczko, D. J., DeMott, P. J., Fösig, R., Goodell, M., Höhler, K., Hill, T. C. J., Jentzsch, C., Ladino, L. A., Levin, E. J. T., Mertes, S., Möhler, O., Moore, K. A., Murray, B. J., Nadolny, J., Pfeuffer, T., Picard, D., Ramírez-Romero, C., Ribeiro, M., Richter, S., Schrod, J., Sellegri, K., Stratmann, F., Swanson, B. E., Thomson, E. S., Wex, H., Wolf, M. J., and Freney, E.: The Puy de Dôme ICe Nucleation Intercomparison Campaign (PICNIC): comparison between online and offline methods in ambient air, *Atmos. Chem. Phys.*, 24, 2651–2678, <https://doi.org/10.5194/acp-24-2651-2024>, 2024.

Mason, R. H., Chou, C., McCluskey, C. S., Levin, E. J. T., Schiller, C. L., Hill, T. C. J., Huffman, J. A., DeMott, P. J., and Bertram, A. K.: The micro-orifice uniform deposit impactor–droplet freezing technique (MOUDI-DFT) for measuring concentrations of ice nucleating particles as a function of size: improvements and initial validation, *Atmos. Meas. Tech.*, 8, 2449–2462, <https://doi.org/10.5194/amt-8-2449-2015>, 2015.

Möhler, O., Adams, M., Lacher, L., Vogel, F., Nadolny, J., Ullrich, R., Boffo, C., Pfeuffer, T., Hobl, A., Weiß, M., Vepuri, H. S. K., Hiranuma, N., and Murray, B. J.: The Portable Ice Nucleation Experiment (PINE): a new online instrument for laboratory studies and automated long-term field observations of ice-nucleating particles, *Atmos. Meas. Tech.*, 14, 1143–1166, <https://doi.org/10.5194/amt-14-1143-2021>, 2021.

Polen, M., Lawlis, E., and Sullivan, R. C.: The unstable ice nucleation properties of Snomax® bacterial particles, *J. Geophys. Res. Atmos.*, 121, 11,666–11,678, <https://doi.org/10.1002/2016JD025251>, 2016.

Polen, M., Brubaker, T., Somers, J., and Sullivan, R. C.: Cleaning up our water: reducing interferences from nonhomogeneous freezing of “pure” water in droplet freezing assays of ice-nucleating particles, *Atmos. Meas. Tech.*, 11, 5315–5334, <https://doi.org/10.5194/amt-11-5315-2018>, 2018.

Pummer, B. G., Bauer, H., Bernardi, J., Bleicher, S., and Grothe, H.: Suspendable macromolecules are responsible for ice nucleation activity of birch and conifer pollen, *Atmos. Chem. Phys.*, 12, 2541–2550, <https://doi.org/10.5194/acp-12-2541-2012>, 2012.

Schiebel, P.: Ice Nucleation Activity of Soil Dust Aerosols, Ph. D. thesis, Institute of Meteorology and Climate Research – Atmospheric Aerosol Research, Karlsruhe Institute of Technology, Germany, 131 pp., 2017.

Wex, H., Augustin-Bauditz, S., Boose, Y., Budke, C., Curtius, J., Diehl, K., Dreyer, A., Frank, F., Hartmann, S., Hiranuma, N., Jantsch, E., Kanji, Z. A., Kiselev, A., Koop, T., Möhler, O., Niedermeier, D., Nillius, B., Rösch, M., Rose, D., Schmidt, C., Steinke, I., and Stratmann, F.: Intercomparing different devices for the investigation of ice nucleating particles using Snomax® as test substance, *Atmos. Chem. Phys.*, 15, 1463–1485, <https://doi.org/10.5194/acp-15-1463-2015>, 2015.

Zenker, J., Collier, K. N., Xu, G., Yang, P., Levin, E. J. T., Suski, K. J., DeMott, P. J., and Brooks, S. D.: Using depolarization to quantify ice nucleating particle concentrations: a new method, *Atmos. Meas. Tech.*, 10, 4639–4657, <https://doi.org/10.5194/amt-10-4639-2017>, 2017.

Zolles, T., Burkart, J., Häusler, T., Pummer, B., Hitzenberger, R., and Grothe, H.: Identification of Ice Nucleation Active Sites on Feldspar Dust Particles, *J. Phys. Chem. A*, 119, 11, 2692–2700, <https://doi.org/10.1021/jp509839x>, 2015.
